1 **Inferring Gender from First Names: Comparing the Accuracy of Genderize, Gender API, and the**  
2 **gender R Package on Authors of Diverse Nationality**

3  
4 Alexander D. VanHelene, BS<sup>1,2</sup>; Ishaani Khatri, BS<sup>3</sup>, C. Beau Hilton, MD<sup>4</sup>, Sanjay Mishra, MS, PhD<sup>1,2,3</sup>,  
5 Ece D. Gamsiz Uzun, MS, PhD, FAMIA<sup>2,3,5,6</sup>, Jeremy L. Warner, MD, MS, FAMIA, FASCO<sup>1,2,3\*</sup>

6  
7 <sup>1</sup>Lifespan Cancer Institute, Rhode Island Hospital, Providence, Rhode Island

8 <sup>2</sup>Center for Clinical Cancer Informatics and Data Science, Legorreta Cancer Center, Brown University,  
9 Providence, Rhode Island

10 <sup>3</sup>Warren Alpert Medical School, Brown University, Providence, Rhode Island

11 <sup>4</sup>Department of Internal Medicine, Vanderbilt University, Nashville, Tennessee

12 <sup>5</sup>Center for Computational Molecular Biology, Brown University, Providence, Rhode Island

13 <sup>6</sup>Department of Pathology and Laboratory Medicine, Brown University, Providence, Rhode Island

14  
15 \*Corresponding Author:

16 Jeremy L. Warner, MD, MS, FAMIA, FASCO

17 593 Eddy St.

18 Providence, RI 02903

19 401-444-7882

20 [jeremy\\_warner@brown.edu](mailto:jeremy_warner@brown.edu)

21

22

23

24

25

26

27 **Abstract**

28           Meta-researchers commonly leverage tools that infer gender from first names, especially when  
29 studying gender disparities. However, tools vary in their accuracy, ease of use, and cost. The objective of  
30 this study was to compare the accuracy and cost of the commercial software Genderize and Gender API,  
31 and the open-source gender R package. Differences in binary gender prediction accuracy between the  
32 three services were evaluated. Gender prediction accuracy was tested on a multi-national dataset of  
33 32,968 gender-labeled clinical trial authors. Additionally, two datasets from previous studies with 5779  
34 and 6131 names, respectively, were re-evaluated with modern implementations of Genderize and Gender  
35 API. The gender inference accuracy of Genderize and Gender API were compared, both with and without  
36 supplying trialists' country of origin in the API call. The accuracy of the gender R package was only  
37 evaluated without supplying countries of origin since. The accuracy of Genderize, Gender API, and the  
38 gender R package were defined as the percentage of correct gender predictions. Accuracy differences  
39 between methods were evaluated using McNemar's test. Genderize and Gender API demonstrated overall  
40 96.6% and 96.1% accuracy, respectively, when countries of origin were not supplied in the API calls.  
41 Genderize and Gender API achieved the highest accuracy when predicting the gender of German authors  
42 with accuracies greater than 98%. Genderize and Gender API were least accurate with South Korean,  
43 Chinese, Singaporean, and Taiwanese authors, demonstrating below 82% accuracy. The gender R  
44 package achieved below 86% accuracy on the full dataset. In the replication studies, Genderize and  
45 gender API demonstrated better performance than in the original publications. Our results indicate that  
46 Genderize and Gender API are highly accurate, except when evaluating South Korean, Chinese,  
47 Singaporean, and Taiwanese names. We also demonstrated that Genderize can provide similar accuracy  
48 to Gender API while being 4.85x less expensive.

49

50

51

52

## 53 **Author Summary**

54 Gender disparities in academia have prompted researchers to investigate gender gaps in  
55 professorship roles and publication authorship. Of particular concern are the gender gaps in cancer  
56 clinical trial authorship. Methodologies that evaluate gender disparities in academia often rely on tools  
57 that infer gender from first names. Tools that predict gender from first names are often used in  
58 methodologies that determine the gender ratios of academic departments or publishing authors in a  
59 discipline. However, researchers must choose between different gender predicting tools that vary in their  
60 accuracy, ease of use, and cost. We evaluated the binary gender prediction accuracy of Genderize, Gender  
61 API, and the gender R package on a gold-standard dataset of 32,968 clinical trialists from around the  
62 world. Genderize and Gender API cost money to use, while the gender R package is free and open source.  
63 We found that Genderize and Gender API were more accurate than the gender R package. In addition,  
64 Genderize is cheaper than Gender API, but is more sensitive to inconsistencies in name formatting and  
65 the presence of diacritical marks. Both Genderize and Gender API were most accurate with western  
66 names.

## 68 **Introduction**

69 One of the most well-documented disparities in STEM is gender disparity [1,2]. This issue is  
70 especially notable in the cancer clinical trial domain, with underrepresentation of women in the leadership  
71 of pivotal trials documented as recently as within the last decade [3]. The study of gender disparity in  
72 scientific authorship often requires the determination of gender from very limited data, e.g., author  
73 forenames. Software [4–9] that infers gender from forenames could potentially enable researchers to  
74 automate gender prediction in large datasets. Commercial gender prediction services [10,11] such as  
75 Genderize and Gender API programmatically predict gender from first names. The gender R package [12]  
76 is an open-source alternative to these proprietary gender prediction tools.

77 Gender prediction software has demonstrated high accuracy when evaluating Western first  
78 names, but often falters when evaluating names from Asian cultures [13]. Further, the presence of

79 diacritical marks and hyphens reportedly affects the accuracy of gender prediction in some tools [14].  
80 Few studies [15] to date have evaluated differences in accuracy in gender predicting software between  
81 Western and non-Western names. To our knowledge, no studies have evaluated how different ways of  
82 delimiting two-part first names e.g. Jean-Pierre vs Jean Pierre vs Jeanpierre, affect gender prediction  
83 accuracy.

84 We compared the gender prediction accuracy of Genderize, Gender API, and the gender R  
85 package using a large manually curated registry of cancer clinical trialists with labeled genders and  
86 diverse nationalities. In addition, we quantified the accuracy of these tools by author nationality and  
87 compared different strategies for delimiting two-part forenames, which are common in the English  
88 language spelling of Korean, Chinese, Singaporean, and Taiwanese names.

89

## 90 **Materials and Methods**

91 Three gender prediction tools: 1) Genderize; 2) Gender API; and 3) the gender R package, were  
92 tested on a gold-standard registry of cancer clinical trialists with manually determined binary gender.  
93 Trialists' names and affiliations were sourced from the HemOnc knowledge base, [16] a continually  
94 growing resource created to capture the standard-of-care treatments in the fields of hematology and  
95 oncology. The binary gender classifications used in our study refer to socially constructed gender  
96 categories, not biological sex [17,18]. Names in HemOnc are primarily sourced from the MEDLINE  
97 records of published clinical trials and undergo extensive normalization to account for the presence of  
98 diacritics, middle initials, misspellings, multipart last names represented as middle names, and other  
99 variations. When first names are not available through MEDLINE, the original manuscripts are examined  
100 for this information. Binary gender is determined by a combination of automated mappings of typically  
101 masculine or feminine forenames (e.g., John; Rebecca), web searches of publicly available information  
102 such as biographies on academic web pages, and consensus determinations including consultation with  
103 native speakers. If gender cannot be determined after these efforts, the author is labeled as “unknown

104 gender”. A subset of journals does not provide forenames; in these cases, the gender is labeled as “could  
105 not be determined.” Country affiliations sourced from MEDLINE also undergo extensive normalization.

106 Gender prediction accuracy was defined as the percent of individuals whose gender was correctly  
107 predicted, as compared to the gold standard dataset. The percent of incorrect gender predictions and the  
108 percent of names with no predicted gender were also calculated. For binary statistical tests, gender  
109 predictions were categorized as successes or failures – correct gender predictions were defined as  
110 successes, while names with incorrect or absent predictions were failures.

111 All trialists with a gender determination were evaluated with Genderize and Gender API on 2023-  
112 11-21 using the R package httr (version 1.4.7). Both US Social Security Administration (SSA) and US  
113 Census Integrated Public Use Microdata Series (IPUMS) name datasets were used as a reference when  
114 predicting names with the gender R package [12] (version 0.6.0).

115 Genderize and Gender API were used to predict names with and without supplying a country of  
116 origin for the subset of authors with a singular country of affiliation. The Gender R package was only  
117 tested without supplying country names because the SSA and IPUMS methods do not provide that  
118 functionality. Two-part names were concatenated without any delimiter e.g. Jean-Pierre was converted to  
119 jeanpierre. Middle names were removed, unless an author had a first initial/middle name, in which case  
120 their middle name was used. Gender bias in name prediction was descriptively evaluated by calculating  
121 the percent of names that were misgendered, compared to the gold standard labeled dataset. In an  
122 additional analysis, accuracy differences resulting from delimiting two-part first names with different  
123 characters were evaluated. Two-part first name prediction accuracy was also evaluated using the first half  
124 of two-part names only. For example, the name Jean-Pierre was tested four ways: 1) jean-pierre; 2) jean  
125 pierre; 3) jeanpierre; and 4) jean.

126 In addition to predicting the gender of a first name, Genderize and Gender API also report an  
127 estimated probability that a gender prediction is correct. We evaluated the correlation between these API-  
128 reported probability estimates and the gold standard labeled dataset with linear regressions and Brier

129 scores. Names with a reported probability less than or equal to 50% were excluded from the regression  
130 and Brier scores.

131 The gender prediction accuracies of Genderize and Gender API were also separately evaluated  
132 using publicly available datasets from two studies [15,19] that tested gender prediction in 2018 and 2021,  
133 respectively. The dataset [20] provided by Santamaria 2018 consisted of 5,779 names sourced from  
134 various other datasets. The dataset [21] sourced from Sebo 2021 consisted of 6,131 Swiss physicians. The  
135 names from these public datasets were not modified prior to our evaluation on 2023-11-07. Nor were  
136 nationalities supplied to Genderize and Gender API when evaluating these public datasets, following the  
137 original experimental design.

138 All software accuracy comparisons were computed in R version 4.3.1. Differences in accuracy  
139 between methods were evaluated using the default R stats package implementation of McNemar's test  
140 [22]. Data analysis was facilitated with tidyverse [23] (version 2.0.0), haven [24] (version 2.5.3), readxl  
141 [25] (version 1.4.3), testthat [26] (version 3.1.10), ggpmisc [27] (version 0.5.5), and patchwork [28]  
142 (version 1.1.3) R libraries.

143

## 144 **Results**

145 Out of 40,273 unique clinical trialists present in the HemOnc KB as of 2023-11-21, 37,420  
146 (92.9%) had a resolvable first name and were thus eligible for gender determination. This group was  
147 sourced from 7,473 clinical trial manuscripts published between 1947-2023. After excluding trialists with  
148 gender not yet determined (n=4,360, 11.7%), those with a determined unknown gender (n=78, 0.2%), and  
149 those with a determined gender but initial-only first names (n=14, <0.1%), the final analysis set included  
150 32,968 trialists with predetermined binary gender. Of the 32,968 trialists, 11,398 (34.6%) were designated  
151 as women. There were 7849 unique names after normalizing first initial/middle name combinations to  
152 only include a middle name. The remainder of names were shared by more than one individual. Michael  
153 was the most common name, with 473 (1.4%) occurrences. Only 1,899 (24.2%) of names occurred more  
154 than twice.

155 Of 25,240 trialists with a known site affiliation, 24,930 (98.8%) were affiliated with sites in a  
156 single country and were assigned to the country of their affiliated institution when querying Genderize  
157 and Gender API with nationalities. When excluding clinical trialists without a recorded country of origin,  
158 the number of trialists and unique names was 24,930 and 6,756, respectively. The final analysis set  
159 included trialists from 87 countries, the most abundant being the US with 9,485 (38%) affiliated trialists.  
160 There were 7,569 first name-country combinations that occurred only once. The most common first-  
161 name-country combination was David-US with 201 (0.8%) instances. Only 1,760 (7.1%) of first name-  
162 country combinations appeared more than twice. The 100 most common trialist name-country  
163 combinations are presented in **Supplementary Table 1**.

164

#### 165 **Gender prediction accuracy when country of origin was not supplied (baseline case)**

166 The overall accuracy of Genderize when predicting gender for the full dataset without supplying  
167 country was 96.6% with 2.3% incorrect gender predictions and 1.1% of names yielding no prediction  
168 (**Table 1**). Similarly, the overall accuracy of Gender API was 96.1% with 2.7% incorrect gender  
169 predictions and 1.1% of names resulting in no prediction. The accuracy of the gender R package's  
170 predictions was lower, with 79.8% and 85.7% accuracy with the IPUMS and SSA methods, respectively.  
171 Names of men were misgendered as women less than 3% of the time for all gender prediction tools  
172 (**Table 1**). Names of women were misgendered over 3% of the time for all services except the gender R  
173 package when using SSA data as a reference. The difference in the percent of correct gender predictions  
174 between Genderize and Gender API was significant in favor of Genderize ( $p < 0.001$ ). Likewise, the  
175 accuracy difference between the gender R package methods were also significant ( $p < 0.001$ ), in favor of  
176 the SSA method. Gender API demonstrated higher gender prediction accuracy when two-part names were  
177 delimited with a space: the percent of correctly inferred genders rose from 96.1% to 96.3%.

178

179

180

181 **Table 1: Accuracy of Gender Predictions on 32,968 Included Trialists**

| Method <sup>a</sup> | Correct, n (%)        | Incorrect, n (%)   | No Predictions, n (%) | Men Incorrectly Gendered as Women, n (%) <sup>b</sup> | Women Incorrectly Gendered as Men, n (%) <sup>b</sup> |
|---------------------|-----------------------|--------------------|-----------------------|-------------------------------------------------------|-------------------------------------------------------|
| Genderize           | 31,857/32,968 (96.6%) | 763/32,968 (2.3%)  | 348/32,968 (1.1%)     | 401/21,324 (1.9%)                                     | 362/11,296 (3.2%)                                     |
| Gender API          | 31,690/32,968 (96.1%) | 899/32,968 (2.7%)  | 379/32,968 (1.1%)     | 393/21,320 (1.8%)                                     | 506/11,269 (4.5%)                                     |
| gender (IPUMS)      | 26,294/32,968 (79.8%) | 1366/32,968 (4.1%) | 5308/32,968 (16.1%)   | 508/17,941 (2.8%)                                     | 858/9719 (8.8%)                                       |
| gender (SSA)        | 28,266/32,968 (85.7%) | 590/32,968 (1.8%)  | 4112/32,968 (12.5%)   | 489/18,595 (2.6%)                                     | 101/10,261 (1%)                                       |

182 <sup>a</sup>Two-part first names were appended together without a delimiting character.

183 <sup>b</sup>Denominators are not consistent across rows because names that did not return a gender prediction for a  
184 given service were excluded.

185  
186 After restricting Genderize’s predictions to trialists affiliated with a single country, the percentage  
187 of correct, incorrect, and missing predictions were 96.2%, 2.6%, and 1.2% respectively (**Fig 1A**).  
188 Genderize achieved the highest accuracy when evaluating first names from German authors, and the  
189 lowest accuracy when evaluating names from South Korean, Chinese, Singaporean, and Taiwanese  
190 authors. When evaluating the same 24,929 clinical trialists with Gender API, the percentage of correct,  
191 incorrect, and missing predictions were 95.8%, 3%, and 1.3% respectively. Gender API also had high  
192 accuracy when predicting the gender of German authors, and the lowest accuracy when evaluating names  
193 from South Korean, Chinese, Singaporean, and Taiwanese authors. The difference in accuracy between  
194 Genderize and Gender API is significant ( $p < 0.001$ ), in favor of Genderize.

195  
196 **Gender prediction accuracy when country of origin was supplied to the API**

197 The gender prediction accuracies when countries of origin were supplied to Genderize and  
198 Gender API are visualized in **Fig 1B**. Supplying the countries of origin alongside first names in the API  
199 call decreased the percentage of correct gender predictions when using Genderize from 96.2% to 95.4%,



200 while also reducing the percentage of incorrect predictions from 2.6% to 2.1%. Conversely, including  
201 countries of origin increased the ratio of correct gender predictions of Gender API from 95.8% to 96%  
202 and decreased incorrect predictions from 3% to 2.7%. Supplying countries also increased the percentage  
203 of names with no gender prediction for Genderize from 1.2% to 2.5%, while Gender API remained  
204 constant at 1.3%. The difference in accuracy between Genderize and Gender API was significant in favor  
205 of Gender API ( $p < 0.001$ ).

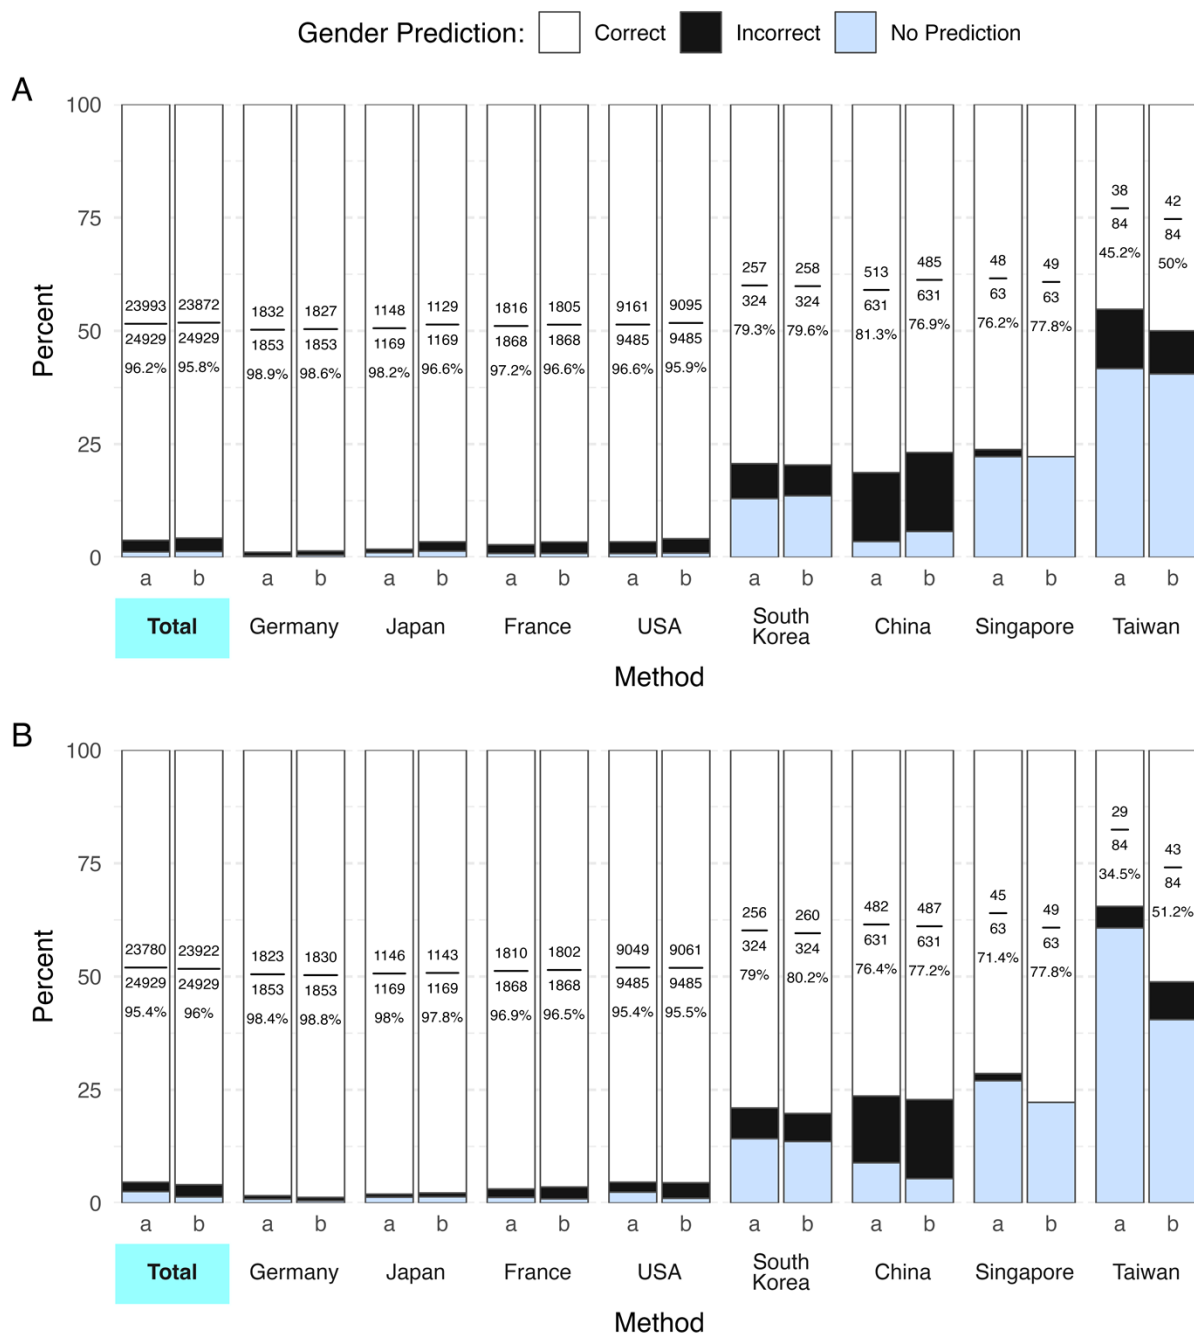

206  
 207 **Fig 1: Accuracy of Gender Predictions.** Panel A shows the gender prediction accuracies when countries  
 208 are not included in the API call. Panel B shows the results when countries are included in the API call.  
 209 The top 4 countries with the most trialists and all Asian countries are plotted. Method a is genderize and  
 210 method b is Gender API. Each bar is labeled with the fraction and percentage of correct gender  
 211 predictions. Two-part first names were appended together without a delimiting character.

## 212 **Gender Prediction accuracy when using different characters to delimit two-part forenames**

213 Gender prediction accuracy when evaluating two-part names was higher when countries were not  
214 included in the API call in all contexts except when calling Genderize with the first half of a two-part  
215 name, e.g., Jean-Pierre as jean. Genderize was most accurate (76.4%) when no character was used to  
216 delimit two-part names, e.g., Jean-Pierre represented as jeanpierre (**Fig 2**). Genderize provided zero  
217 predictions for two-part first names delimited with a space. In contrast, Gender API achieved the highest  
218 gender prediction accuracy when delimiting two-part names with a space (83.5%). Gender prediction  
219 accuracy for two-part names was worse than for one-part names when countries were not included in the  
220 API call and two-part names were separated without a delimiter: OR 0.07 (95% CI 0.06-0.08) for  
221 Genderize and OR 0.08 (95% CI 0.07-0.09) for Gender API, respectively.

222 The accuracy of Genderize and Gender API were evaluated for statistical significance by  
223 comparing the percent of correct gender predictions between delimiter categories. The difference in  
224 Gender prediction accuracy between Genderize and Gender API when evaluating two-part names without  
225 a delimiting character and including countries in the API call was not significant. All other comparisons  
226 between Genderize and Gender API were significant in favor of Gender API ( $p < 0.001$ ).

227

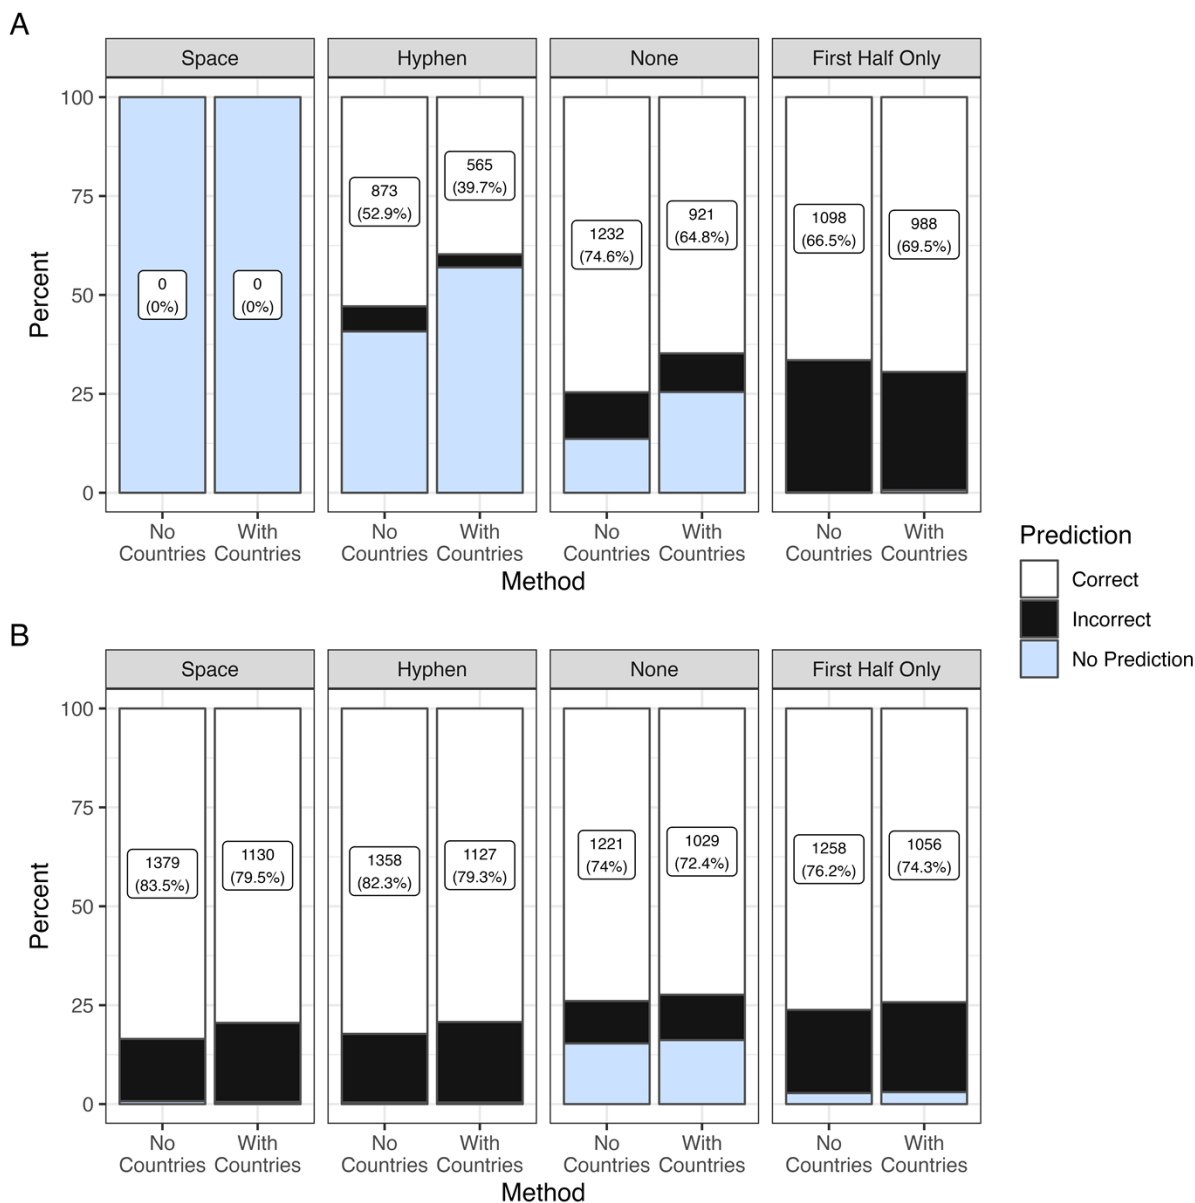

228  
 229 **Fig 2: Accuracy of Gender Predictions Based on Delimiter between Two-Part Names.** Panel A is  
 230 Genderize and Panel B is Gender API. Plot facets correspond to the type of delimiter separating two-part  
 231 names. Stacked bars correspond to correct, incorrect, and no predictions respectively. Bars are labeled  
 232 with the count and percent of correct gender predictions.

233  
 234  
 235

236 **Gender prediction accuracy by API-reported confidence thresholds**

237           There was high agreement overall between gender prediction services and the gold standard  
238 labeled dataset (**Fig 3**). Genderize reported over 50% confidence in gender predictions for 32,573 (98.8%)  
239 trialists. Similarly, Gender API reported over 50% confidence for 32,587 (98.8%) trialists. Gender API  
240 demonstrated a correlation of 0.91 between its reported confidence and actual accuracy, compared to  
241 Genderize’s correlation of 0.82. The Brier scores for Gender API and Genderize were 0.0077 and 0.0048  
242 respectively.

243

244

245

246

247

248

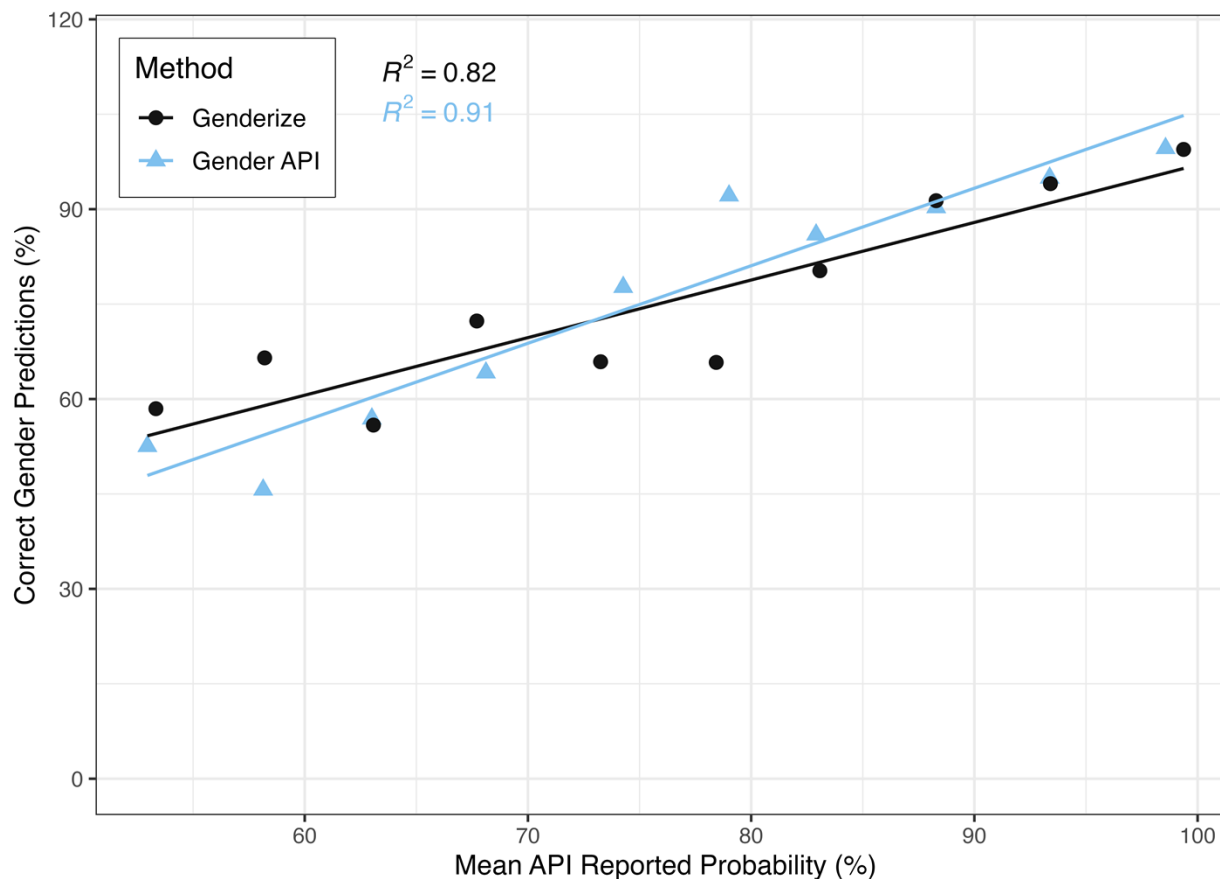

249

250 **Fig 3: Experimental Name Prediction Accuracy At Different API Probability Cutoffs.** Names with  
251 gender predictions were aggregated into the following API reported probability bins: 50%-55%, 55%-  
252 60%, 60%-65%, 65%-70%, 70%-75%, 75%-80%, 80%-85%, 85%-90%, 90%-95%, 95%-100%. The API  
253 reported probabilities within each bin were averaged and plotted on the x-axis. The experimentally  
254 determined gender prediction accuracies for the names in each bin are visualized on the y-axis.

255

### 256 **Replication of analyses by Santamaria 2018 and Sebo 2021**

257 The original dataset used by Santamaria consisted of 5779 first names with known genders, 34%  
258 of whom were women. Only 0.4% of the 5779 had diacritical marks. In addition, 1.1% and 2% of names  
259 contain spaces or hyphens, respectively. The original paper reported 80% accuracy using Genderize and  
260 87% using Gender API. In our re-analysis, Genderize predicted the correct gender 92.5% of the time.

261 Similarly, Gender API achieved 92.8% accuracy. The difference in accuracy between Genderize and  
262 Gender API was not statistically significant.

263 The dataset originally analyzed by Sebo 2021 included 6131 names of whom 50.3% were  
264 women. Diacritical marks were present in 6.6% of names. 10.2% of names contained spaces, and 6.6% of  
265 names included a hyphen. The original paper reported 81% accuracy using Genderize and 97% with  
266 Gender API. In our re-analysis, the accuracy of Genderize and Gender API on these 6131 names were  
267 86.2% and 98% respectively. McNemar's test indicated that the differences in accuracy was statistically  
268 significant ( $p < 0.001$ ), in favor of Gender API. Gender API was 99.5% accurate when evaluating names  
269 with diacritical marks, while Genderize was 71.7% accurate.

270

## 271 **Cost and Accessibility**

272 Genderize and Gender API provide a graphical user interface, while the gender R package  
273 requires programming. Genderize [10] provides 1,000 free predictions per day, whereas Gender API [11]  
274 only allows 100 free predictions per month. Gender API currently costs 4.85x more than Genderize for a  
275 monthly subscription that provides 100,000 predictions.

276

## 277 **Discussion**

278 Genderize and Gender API both demonstrated over 95% overall accuracy on our gold-standard  
279 dataset of cancer clinical trialists. Genderize was slightly more accurate than Gender API when countries  
280 were not included in the API call. Conversely, Gender API performed slightly better than Gender API  
281 when countries were included. For both services, including countries reduced the number of incorrect  
282 gender assignments at the cost of increasing the number of names with no predicted gender (**Fig 1,**  
283 **Supplementary Table 2, Supplementary Table 3**). The gender R package performed worse than  
284 Genderize or Gender API (**Table 1**).

285 Genderize and Gender API differed in how their accuracy was affected by the delimiter  
286 separating two-part first names. Genderize was most accurate when two-part first names were appended

287 together without a delimiter (**Fig 2**). In fact, Genderize appeared to be incompatible with two-part first  
288 names that were delimited by a space as the service yielded zero correct predictions when evaluating such  
289 names. Conversely, Gender API performed best when two-part first names were delimited with a space.  
290 The slightly higher overall gender prediction accuracy attained by Genderize compared to Gender API is  
291 partially an artifact of our decision to append two-part names without a delimiter in the baseline  
292 comparison, since Gender API performed best when two-part names were delimited with a space.

293 A commonality between this analysis and several previous studies was the lower prediction  
294 accuracy of Genderize and Gender API when evaluating Asian names, with the exception of Japanese  
295 names [15,19]. The higher accuracy achieved for both services in our re-analysis of Santamaria’s dataset  
296 indicates that both services have improved since 2015, although Genderize improved by a larger margin.  
297 Gender API outperformed Genderize when re-analyzing Sebo’s dataset largely because Gender API  
298 handled two-part names that were delimited by spaces as well as names with diacritical marks. In fact, a  
299 follow up study [14] by the same author recommended removing diacritical marks and modifying two-  
300 part names to improve the accuracy of Genderize.

301 This study’s results should be interpreted with certain caveats in mind. We did not filter out  
302 recurring first names during this analysis because the count of names in real-world datasets like ours tends  
303 to follow a long-tail distribution [29]. The process for determining the “gold-standard” gender of each of  
304 the trialists relied on inference from available information. Affiliation data was missing for a substantial  
305 subset of authors, mostly due to the older practice of MEDLINE including only the affiliation of the first  
306 author; a substantial number of high-profile oncology journals (e.g., the *Journal of Clinical Oncology* and  
307 *Blood*) did not include clear 1:1 mappings for author-to-affiliation for a period of time; this issue affects  
308 at least 320 (4%) of manuscripts in the HemOnc KB. A substantial subset of recently added authors to the  
309 HemOnc KB have not had their gender determined yet (13.7%), and this subset has some important  
310 differences from the set of determined genders. Most notably, the undetermined subset has many more  
311 Asian hyphenated names (43.8% vs 3.8%) and authors with a country of affiliation including South  
312 Korea, China, Singapore, and/or Taiwan (45.6% vs 3.42%). It is thus likely that our results represent a



313 “best-case scenario” and that automated gender mapping will become increasingly difficult as cancer  
314 clinical trials are increasingly conducted in the Asia-Pacific region [30,31]. Additionally, a researcher’s  
315 nationality in our data set does not always reflect the cultural origin of their first name as some  
316 researchers immigrated to the country of their academic affiliation.

317         It is important to note that Genderize, Gender API, and the gender R package assume a gender  
318 binary. However, a recent survey [32] found that 1.6% of U.S. adults identify as transgender or  
319 nonbinary. With new algorithmic advancements such as Genderize and Gender API, it is imperative that  
320 inclusivity is incorporated. Going forward, tools that infer gender based on name should be trained on  
321 data that include transgender and nonbinary people, and they should include the option to predict an  
322 individual as non-binary or transgender. Gender prediction is not simply a binary classification problem.  
323 Transgender individuals will likely make up a small percentage of the dataset of names, which could  
324 make obtaining a correct prediction for these individuals very challenging. Yet, by not incorporating  
325 them, we are excluding countless people from this algorithm and ensuring the prediction of their gender  
326 to have a 0% accuracy.

327         Both Genderize and Gender API demonstrated high gender prediction accuracy with Western  
328 names that were highly normalized without middle or last names or diacritical marks. The cost per name  
329 evaluated with Genderize is also several times cheaper than Gender API. However, Genderize loses  
330 accuracy compared to Gender API when name formatting becomes less consistent. The SSA and IPUMS  
331 methods of the gender R package were less accurate but are open-source alternatives. The results from  
332 this study provide a new benchmark for gender inference tools.

333

334 **Alexander D. VanHelene:** Conceptualization, Methodology, Software, Validation, Formal analysis,  
335 Investigation, Data Curation, Writing - Original Draft, Writing - Review & Editing, Visualization.

336 **Ishaani Khatri:** Conceptualization, Writing - Original Draft, Writing - Review & Editing. **C. Beau**

337 **Hilton:** Formal analysis, Writing - Review & Editing. **Sanjay Mishra:** Methodology, Formal analysis,

338 Investigation, Data Curation, Visualization, Writing - Review & Editing, Funding acquisition. **Ece D.**

339 **Gamsiz Uzun:** Visualization, Writing - Review & Editing. **Jeremy L. Warner:** Conceptualization,  
340 Methodology, Validation, Formal analysis, Investigation, Resources, Data Curation, Writing - Original  
341 Draft, Writing - Review & Editing, Visualization, Supervision, Funding acquisition.

342

343 **Acknowledgements**

344 We would like to acknowledge the efforts of the editorial board of HemOnc.org.

345

346

347 **References**

- 348 1. Chatterjee P, Werner RM. Gender Disparity in Citations in High-Impact Journal Articles. *JAMA*  
349 *Netw Open*. 2021;4: e2114509. doi:10.1001/jamanetworkopen.2021.14509
- 350 2. Murphy M, Callander JK, Dohan D, Grandis JR. Women’s Experiences of Promotion and Tenure in  
351 Academic Medicine and Potential Implications for Gender Disparities in Career Advancement: A  
352 Qualitative Analysis. *JAMA Netw Open*. 2021;4: e2125843.  
353 doi:10.1001/jamanetworkopen.2021.25843
- 354 3. Dymanus KA, Butaney M, Magee DE, Hird AE, Luckenbaugh AN, Ma MW, et al. Assessment of  
355 gender representation in clinical trials leading to FDA approval for oncology therapeutics between  
356 2014 and 2019: A systematic review-based cohort study. *Cancer*. 2021;127: 3156–3162.  
357 doi:10.1002/cncr.33533
- 358 4. Wais K. Gender Prediction Methods Based on First Names with genderizeR. *R J*. 2016;8/1: 17–37.
- 359 5. Cevik M, Haque SA, Manne-Goehler J, Kuppalli K, Sax PE, Majumder MS, et al. Gender disparities  
360 in coronavirus disease 2019 clinical trial leadership. *Clin Microbiol Infect*. 2021;27: 1007–1010.  
361 doi:10.1016/j.cmi.2020.12.025
- 362 6. Topaz CM, Sen S. Gender Representation on Journal Editorial Boards in the Mathematical Sciences.  
363 Danforth CM, editor. *PLOS ONE*. 2016;11: e0161357. doi:10.1371/journal.pone.0161357
- 364 7. Nielsen MW, Andersen JP, Schiebinger L, Schneider JW. One and a half million medical papers  
365 reveal a link between author gender and attention to gender and sex analysis. *Nat Hum Behav*.  
366 2017;1: 791–796. doi:10.1038/s41562-017-0235-x
- 367 8. Sebo P, Clair C. Are female authors under-represented in primary healthcare and general internal  
368 medicine journals? *Br J Gen Pract*. 2021;71: 302.1-302. doi:10.3399/bjgp21X716249
- 369 9. Szymkowiak M. Genderizing fisheries: Assessing over thirty years of women’s participation in  
370 Alaska fisheries. *Mar Policy*. 2020;115: 103846. doi:10.1016/j.marpol.2020.103846
- 371 10. Genderize Documentation. In: Genderize [Internet]. [cited 2 Jan 2024]. Available:  
372 <https://genderize.io/>
- 373 11. Gender API - Determines the gender of a first name. [cited 2 Jan 2024]. Available: [https://gender-  
374 api.com/?utm\\_source=adwords&utm\\_medium=cpc&utm\\_campaign=ga3&price-  
375 set=OTG&gad\\_source=1&gclid=Cj0KCQiAhc-  
376 sBhCEARIsAOVwHuQF7HdhUmWIWZfU851GAvR14ziBWaEc6tDDR\\_XKmG6I904GgzaqYr4a  
377 AoCfEALw\\_wcB](https://gender-api.com/?utm_source=adwords&utm_medium=cpc&utm_campaign=ga3&price-set=OTG&gad_source=1&gclid=Cj0KCQiAhc-sBhCEARIsAOVwHuQF7HdhUmWIWZfU851GAvR14ziBWaEc6tDDR_XKmG6I904GgzaqYr4aAoCfEALw_wcB)
- 378 12. Mullen L. gender: Predict Gender from Names Using Historical Data. 2021. Available:  
379 <https://github.com/lmullen/gender>
- 380 13. Sebo P. How accurate are gender detection tools in predicting the gender for Chinese names? A study  
381 with 20,000 given names in Pinyin format. *J Med Libr Assoc*. 2021;110.  
382 doi:10.5195/jmla.2022.1289

- 383 14. Sebo P. Using genderize.io to infer the gender of first names: how to improve the accuracy of the  
384 inference. *J Med Libr Assoc.* 2021;109. doi:10.5195/jmla.2021.1252
- 385 15. Santamaría L, Mihaljević H. Comparison and benchmark of name-to-gender inference services. *PeerJ*  
386 *Comput Sci.* 2018;4: e156. doi:10.7717/peerj-cs.156
- 387 16. Warner JL, Cowan AJ, Hall AC, Yang PC. HemOnc.org: A Collaborative Online Knowledge  
388 Platform for Oncology Professionals. *J Oncol Pract.* 2015;11: e336–e350.  
389 doi:10.1200/JOP.2014.001511
- 390 17. Heidari S, Babor TF, De Castro P, Tort S, Curno M. Sex and Gender Equity in Research: rationale  
391 for the SAGER guidelines and recommended use. *Res Integr Peer Rev.* 2016;1: 2.  
392 doi:10.1186/s41073-016-0007-6
- 393 18. CIHR Institute Of Gender And Health. What a difference sex and gender make : a gender, sex and  
394 health research casebook. 2012 [cited 18 Jan 2024]. doi:10.14288/1.0132684
- 395 19. Sebo P. Performance of gender detection tools: a comparative study of name-to-gender inference  
396 services. *J Med Libr Assoc.* 2021;109. doi:10.5195/jmla.2021.1185
- 397 20. Mihaljevic H, Santamaria L. Evaluation of name-based gender inference methods. *GenderGapSTEM-*  
398 *PublicationAnalysis*; 2023. Available: [https://github.com/GenderGapSTEM-](https://github.com/GenderGapSTEM-PublicationAnalysis/name_gender_inference)  
399 [PublicationAnalysis/name\\_gender\\_inference](https://github.com/GenderGapSTEM-PublicationAnalysis/name_gender_inference)
- 400 21. Sebo P. Performance of gender detection tools: a comparative study of name-to-gender inference  
401 services. 2021 [cited 2 Jan 2024]. doi:10.17605/OSF.IO/KR2MX
- 402 22. R Core Team. R: A Language and Environment for Statistical Computing. R Foundation for  
403 Statistical Computing; Available: <https://www.R-project.org/>
- 404 23. Wickham H, Averick M, Bryan J, Chang W, McGowan L, François R, et al. Welcome to the  
405 Tidyverse. *J Open Source Softw.* 2019;4: 1686. doi:10.21105/joss.01686
- 406 24. Wickham H, Miller E, Smith D. haven: Import and Export “SPSS”, “Stata” and “SAS” Files. 2023.  
407 Available: <https://CRAN.R-project.org/package=haven>
- 408 25. Wickham H, Bryan J. readxl: Read Excel Files. 2023. Available: [https://CRAN.R-](https://CRAN.R-project.org/package=readxl)  
409 [project.org/package=readxl](https://CRAN.R-project.org/package=readxl)
- 410 26. Wickham H. testthat: Get Started with Testing. 2011. Available: [https://journal.r-](https://journal.r-project.org/archive/2011-1/RJournal_2011-1_Wickham.pdf)  
411 [project.org/archive/2011-1/RJournal\\_2011-1\\_Wickham.pdf](https://journal.r-project.org/archive/2011-1/RJournal_2011-1_Wickham.pdf)
- 412 27. Aphalo P. ggpmisc: Miscellaneous Extensions to “ggplot2.” 2023. Available: [https://CRAN.R-](https://CRAN.R-project.org/package=ggpmisc)  
413 [project.org/package=ggpmisc](https://CRAN.R-project.org/package=ggpmisc)
- 414 28. Pedersen T. patchwork: The Composer of Plots. 2023. Available: [https://CRAN.R-](https://CRAN.R-project.org/package=patchwork)  
415 [project.org/package=patchwork](https://CRAN.R-project.org/package=patchwork)
- 416 29. Clauset A, Shalizi CR, Newman MEJ. Power-Law Distributions in Empirical Data. *SIAM Rev.*  
417 2009;51: 661–703. doi:10.1137/070710111

- 418 30. Akiki V, Troussard X, Metges J, Devos P. Global trends in oncology research: A mixed-methods  
419 study of publications and clinical trials from 2010 to 2019. *Cancer Rep.* 2023;6: e1650.  
420 doi:10.1002/cnr2.1650
- 421 31. Terada M, Nakamura K, Matsuda T, Okuma HS, Sudo K, Yusof A, et al. A new era of the Asian  
422 clinical research network: a report from the ATLAS international symposium. *Jpn J Clin Oncol.*  
423 2023;53: 619–628. doi:10.1093/jjco/hyad033
- 424 32. Minkin AB Juliana Menasce Horowitz, Kim Parker and Rachel. The Experiences, Challenges and  
425 Hopes of Transgender and Nonbinary U.S. Adults. In: Pew Research Center’s Social &  
426 Demographic Trends Project [Internet]. 7 Jun 2022 [cited 2 Jan 2024]. Available:  
427 [https://www.pewresearch.org/social-trends/2022/06/07/the-experiences-challenges-and-hopes-of-](https://www.pewresearch.org/social-trends/2022/06/07/the-experiences-challenges-and-hopes-of-transgender-and-nonbinary-u-s-adults/)  
428 [transgender-and-nonbinary-u-s-adults/](https://www.pewresearch.org/social-trends/2022/06/07/the-experiences-challenges-and-hopes-of-transgender-and-nonbinary-u-s-adults/)
- 429
- 430
- 431
